# Supplementary material
Source: publisher site journal article supplement (https://www.dovepress.com/article/373287)
Supplement: Supplementary file 1 [file get_supplementary_file.php]

Supplementary Table 1 Questionnaire to measure capability, opportunity, motivation and behavior

| NO. | Identified questions | Resources | Retain or delete |
| --- | --- | --- | --- |
| C1 | I am aware of the five moments of hand hygiene | Squires JE et al | Retain |
| C2 | I know the contents of hand hygiene guidelines/regulations | Squires JE et al | Retain |
| C3 | I am aware of evidence linking hand hygiene to healthcare-associated infections | Squires JE et al | Retain |
| C4 | I often had training in hand hygiene practice | Squires JE et al Smith JD et al | Retain |
| C5 | Hand hygiene is an important part of my professional training | Smith JD et al | Retain |
| C6 | I do hand hygiene without consciously thinking about it (becoming a habit) | Smith JD et al Squires JE et al Dyson J et al Boscart VM et al | Retain |
| C7 | Easily visible hand hygiene stations and signs remind me to do hand hygiene | Squires JE et al  Smith JD et al | Retain |
| C8 | I find myself forgetting to practice hand hygiene more often than others | Squires JE et al Smith JD et al | Delete in CFA |
| C9 | I sometimes forget to do hand hygiene because I get distracted by other things | Smith JD et al Fuller C et al | Delete in CFA |
| C10 | When not touching a patient or patient environment, hand hygiene is not always necessary | Squires JE et al | Delete in CFA |
| O1 | Hand hygiene stations and hand rub are easy to access | Squires JE et al Smith JD et al Dyson J et al | Retain |
| O2 | Dedicated sinks to do hand hygiene always have liquid soap and paper towel readily available | Smith JD et al | Retain |
| O3 | I am often too busy to do hand hygiene | Squires JE et al Smith JD et al Fuller C et al  Dyson J et al | Retain |
| O4 | When I am busy, I am less likely to comply with hand hygiene guidelines | Squires JE et al | Retain |
| O5 | My coworkers do hand hygiene as often as they should | Squires JE et al | Retain |
| O6 | Department leaders attach importance to hand hygiene | Smith JD et al  Dyson J et al | Retain |
| O7 | The infection management department/Infection prevention and control team urge me to do hand hygiene | Dyson J et al | Retain |
| O8 | Staffs who do good hand hygiene would be praised and encouraged in our department | Boscart VM et al | Retain |
| O9 | I found that my co-workers sometimes do not performed hand hygiene when necessary | Smith JD et al Boscart VM et al | Delete in CFA |
| O10 | The type of job I have makes it difficult to do hand hygiene (such as often in an emergency) | Smith JD et al Dyson J et al | Delete in CFA |
| O11 | Patients do not care whether I do hand hygiene or not | Squires JE et al  Smith JD et al Dyson J et al | Delete in CFA |
| M1 | Practicing hand hygiene reduces/prevents the transmission of infection | Squires JE et al Smith JD et al | Retain |
| M2 | Hand hygiene protects me from infection | Smith JD et al | Retain |
| M3 | Hand hygiene is easy to practice | Squires JE et al | Retain |
| M4 | I am confident that I am following hand hygiene guidelines when practicing hand hygiene | Squires JE et al Dyson J et al | Retain |
| M5 | I can do hand hygiene as frequently as hand hygiene guidelines required | Dyson J et al | Retain |
| M6 | I do hand hygiene out of concern for my patients | Squires JE et al Smith JD et al | Retain |
| M7 | Hand hygiene is a non-negotiable part of healthcare professionals’ job | Squires JE et al Smith JD et al Dyson J et al | Retain |
| M8 | I am fear to bring home germs to anyone else if I don’t do hand hygiene | Boscart VM et al | Retain |
| M9 | Hand hygiene is always necessary | Squires JE et al | Retain |
| M10 | Even if the patient is in urgent need of my help, I will do hand hygiene first | Smith JD et al | Retain |
| M11 | It is important for me to help my department meet its hand hygiene targets | Smith JD et al | Retain |
| M12 | I’ve felt stressed in terms of hand hygiene, and I’ve got other things to do | Boscart VM et al | Delete in CFA |
| M13 | By regularly doing hand hygiene, I can be a role model for others | Smith JD et al | Delete in CFA |
| M14 | I feel guilty or ashamed if I omit hand hygiene | Boscart VM et al | Delete in CFA |
| M15 | I do hand hygiene to protect my family | Smith JD et al | Delete in CFA |
| M16 | When there is an emergency situation, I am less likely to practice hand hygiene | Squires JE et al | Delete in CFA |
| M17 | Frequent hand hygiene is harmful to my skin | Squires JE et al Smith JD et al | Delete in CFA |
| M18 | There are no negative aspects to practicing hand hygiene | Squires JE et al | Delete in CFA |
| M19 | Considering all the other priorities, on a scale of 1 to 5, with 5 being most priority/important, how important do you think it is for you to practice hand hygiene? | Squires JE et al Smith JD et al Dyson J et al | Delete in CFA |
| B1 | In practice, I do hand hygiene before patient contact | WHO 'Five Moments of HH' | Retain |
| B2 | In practice, I do hand hygiene before aseptic technique | WHO 'Five Moments of HH' | Retain |
| B3 | In practice, I do hand hygiene after body fluid exposure | WHO 'Five Moments of HH' | Retain |
| B4 | In practice, I do hand hygiene after patient contact | WHO 'Five Moments of HH' | Retain |
| B5 | In practice, I do hand hygiene after contact with patient surroundings | WHO 'Five Moments of HH' | Retain |

Reference

1 Squires JE, Linklater S, Grimshaw JM, et al. Understanding Practice: factors That Influence Physician Hand Hygiene Compliance. Infect Control

Hospital Epidemiol. 2014;35(12):1511–1520. doi:10.1086/678597

2 Smith JD, Corace KM, MacDonald TK, et al. Application of the Theoretical Domains Framework to identify factors that influence hand hygiene 295

compliance in long-term care. J Hospital Infection. 2019;101(4):393–398. doi:10.1016/j.jhin.2018.12.014

3 Dyson J, Lawton R, Jackson C, Cheater F. Development of a theory-based instrument to identify barriers and levers to best hand hygiene practice

among healthcare practitioners. Implement Sci. 2013;8:111. doi:10.1186/1748-5908-8-111

4 Boscart VM, Fernie GR, Lee JH, Jaglal SB. Using psychological theory to inform methods to optimize the implementation of a hand hygiene

intervention. Implementation Science. 2012;7(1):77. doi:10.1186/1748-5908-7-77

5 Fuller C, Besser S, Savage J, McAteer J, Stone S, Michie S. Application of a theoretical framework for behavior change to hospital workers’ realtime explanations for noncompliance with hand hygiene guidelines. Am J Infect Control. 2014;42(2):106–110. doi:10.1016/j.ajic.2013.07.019

6 World Health Organization, World Alliance for Patient Safety. WHO guidelines on hand hygiene in health care. 2009.
